# Supplementary material
Source: Springer Nature journal article supplement (https://www.springermedizin.de/resource/supplementary/12888_2013_1393_MOESM3_ESM.pdf/9480090)

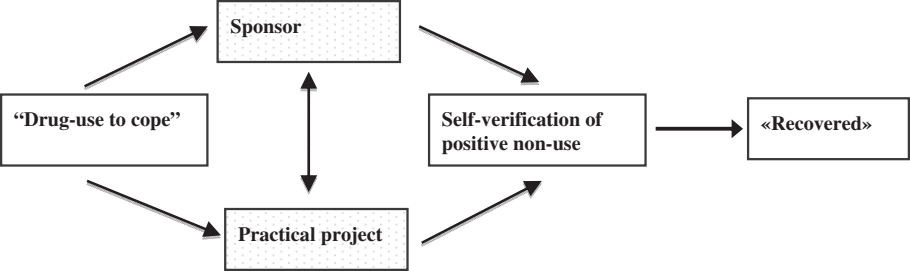

**Sponsor**

**Self-verification of  
positive non-use**

**«Recovered»**

**“Drug-use to cope”**

**Practical project**

Supplement: MOESM3 [file 9480090]
